# Supplementary material for: All‐trans retinoic acid reverses epithelial‐mesenchymal transition in paclitaxel‐resistant cells by inhibiting nuclear factor kappa B and upregulating gap junctions
Source: PubMed Central journal article supplement — Cancer Sci. 2018 Nov 27;110(1):379–88. doi: 10.1111/cas.13855 (PMC6317959; doi:10.1111/cas.13855), 2018-11-27
Supplement: CAS-110-379-s001.pdf [file CAS-110-379-s001.pdf]

Figure S1A  
HCT116

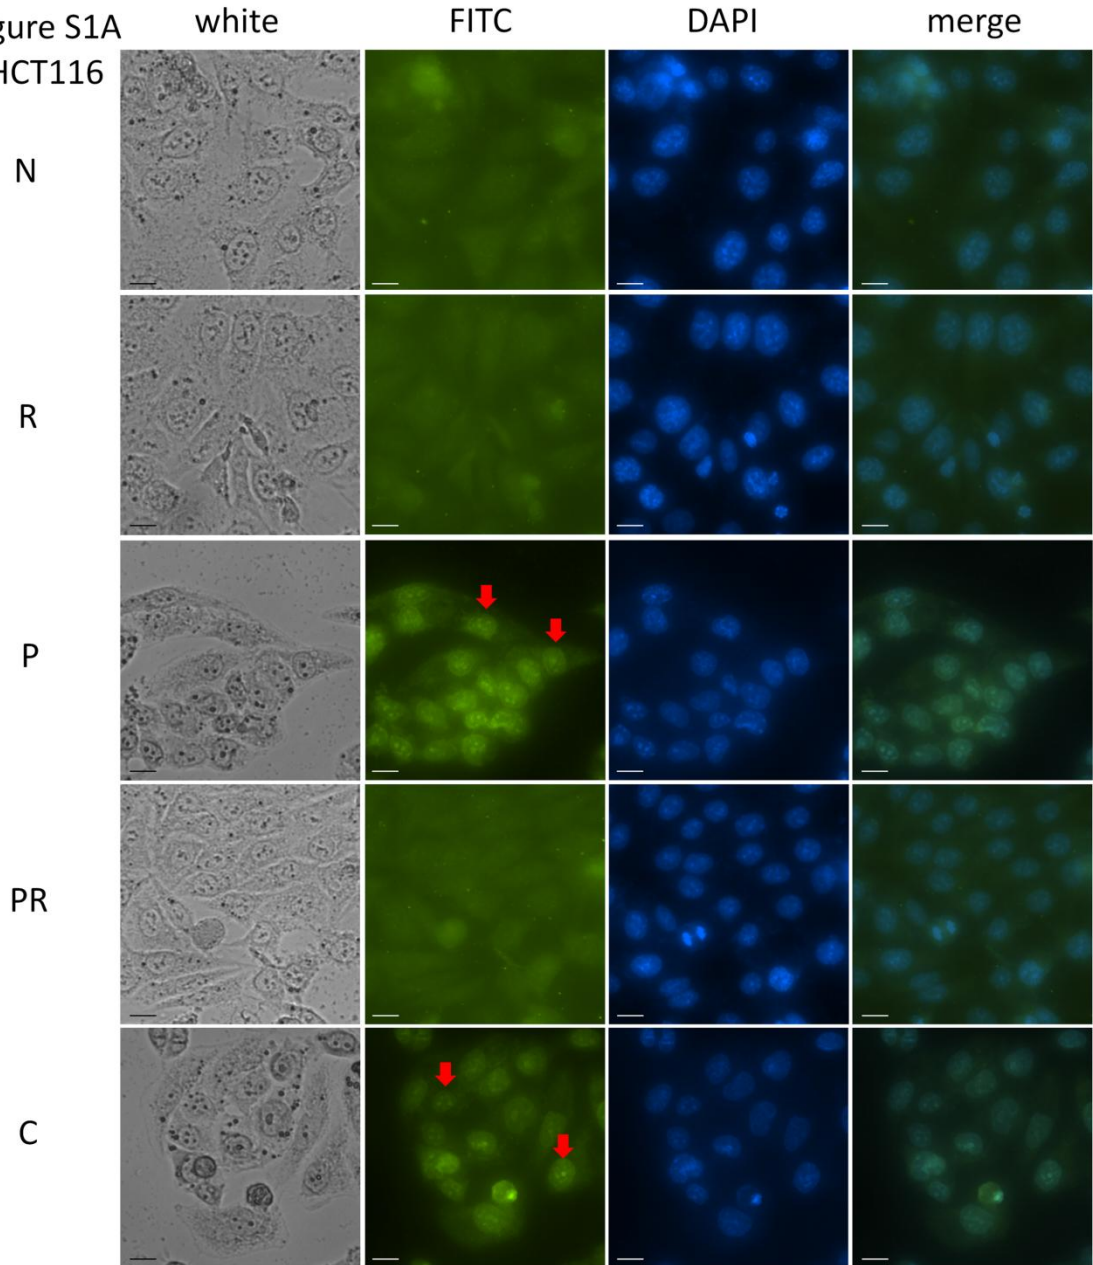

Figure S1B  
LoVo

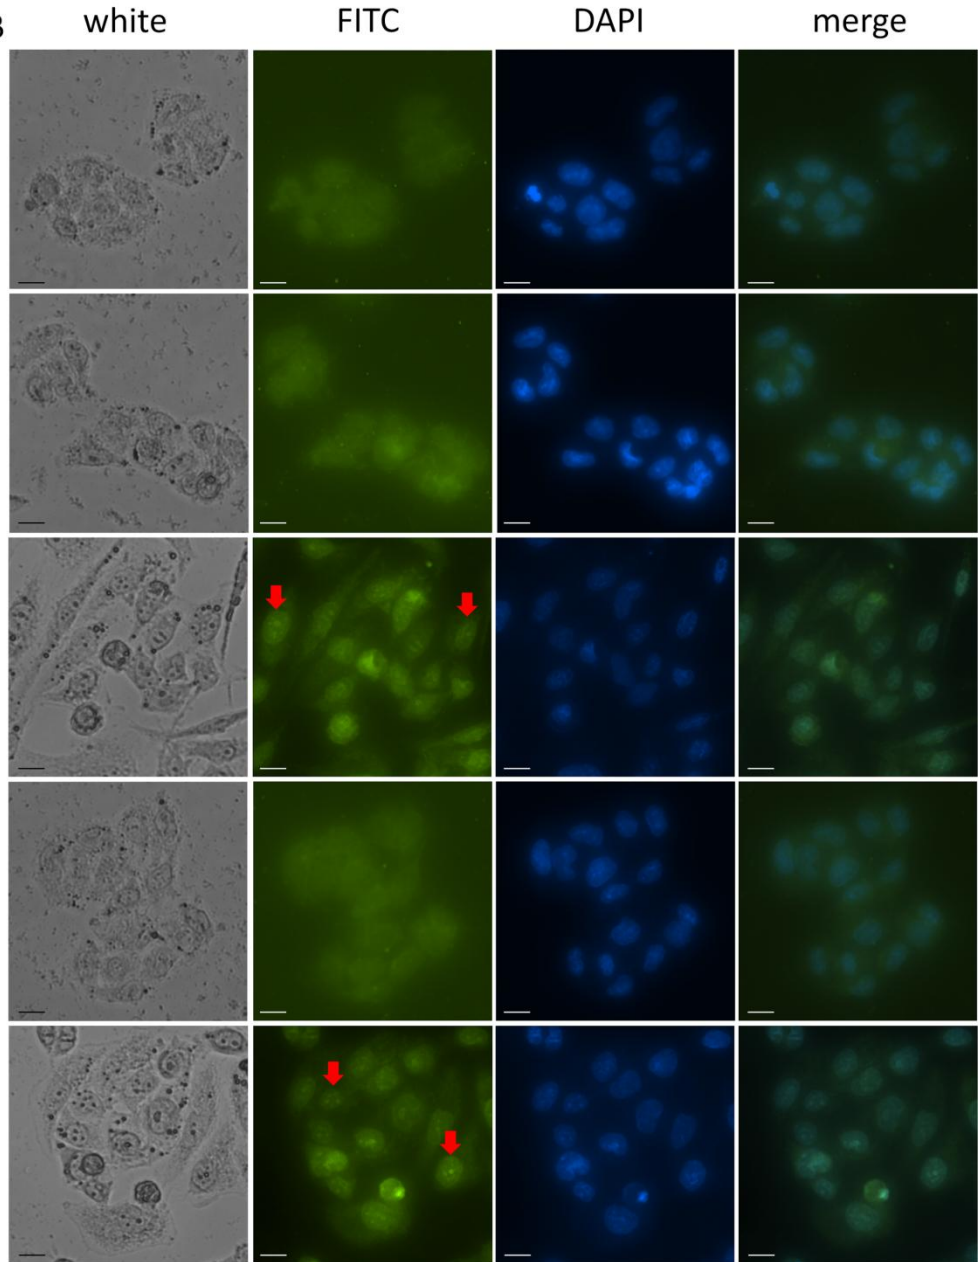

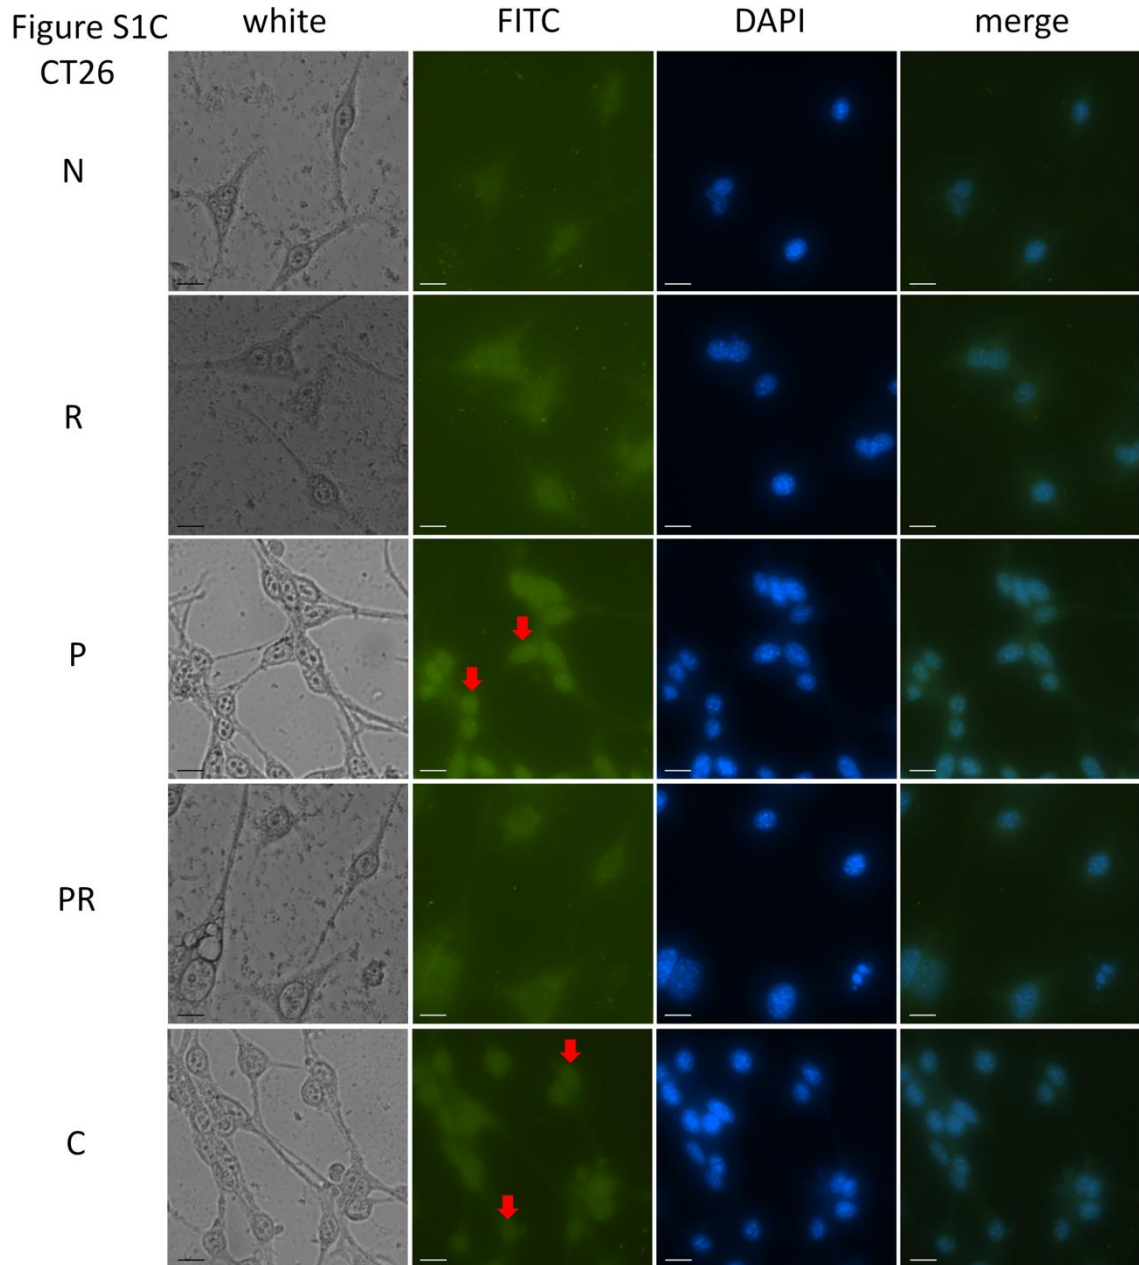

**Figure S1: Immunocytochemistry analysis of NF- $\kappa$ B p65.** The three colorectal cancer cell lines are immunostained with p65 antibody followed by FITC-conjugated antibody. The cell types are listed in the left column. “N”, “R”, “P”, “PR” and “C” were defined in caption of Fig.1. The scale bars represent 20  $\mu$ m. Red arrows indicate that p65 has high expression level in nuclei of “P” group cells by comparison of FITC and DAPI stain. (A) HCT116; (B) LoVo; (C) CT26.
