# Supplementary material for: All‐trans retinoic acid reverses epithelial‐mesenchymal transition in paclitaxel‐resistant cells by inhibiting nuclear factor kappa B and upregulating gap junctions
Source: PubMed Central journal article supplement — Cancer Sci. 2018 Nov 27;110(1):379–88. doi: 10.1111/cas.13855 (PMC6317959; doi:10.1111/cas.13855), 2018-11-27
Supplement: CAS-110-379-s002.pdf [file CAS-110-379-s002.pdf]

Figure S2A  
HCT116

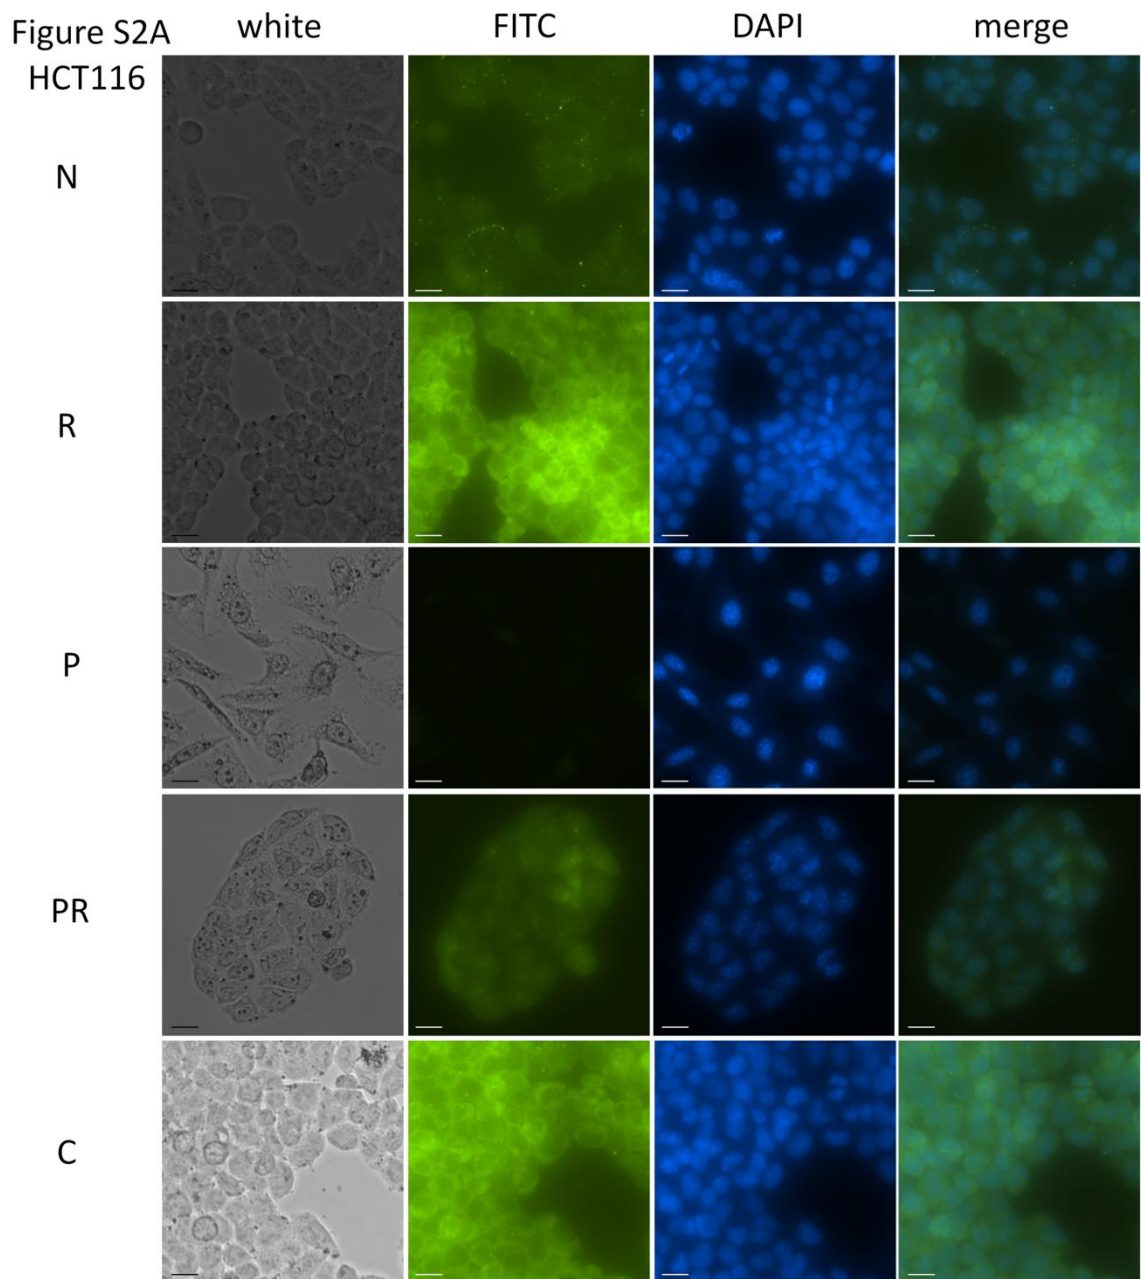

Figure S2B

LoVo

N

R

P

PR

C

white

FITC

DAPI

merge

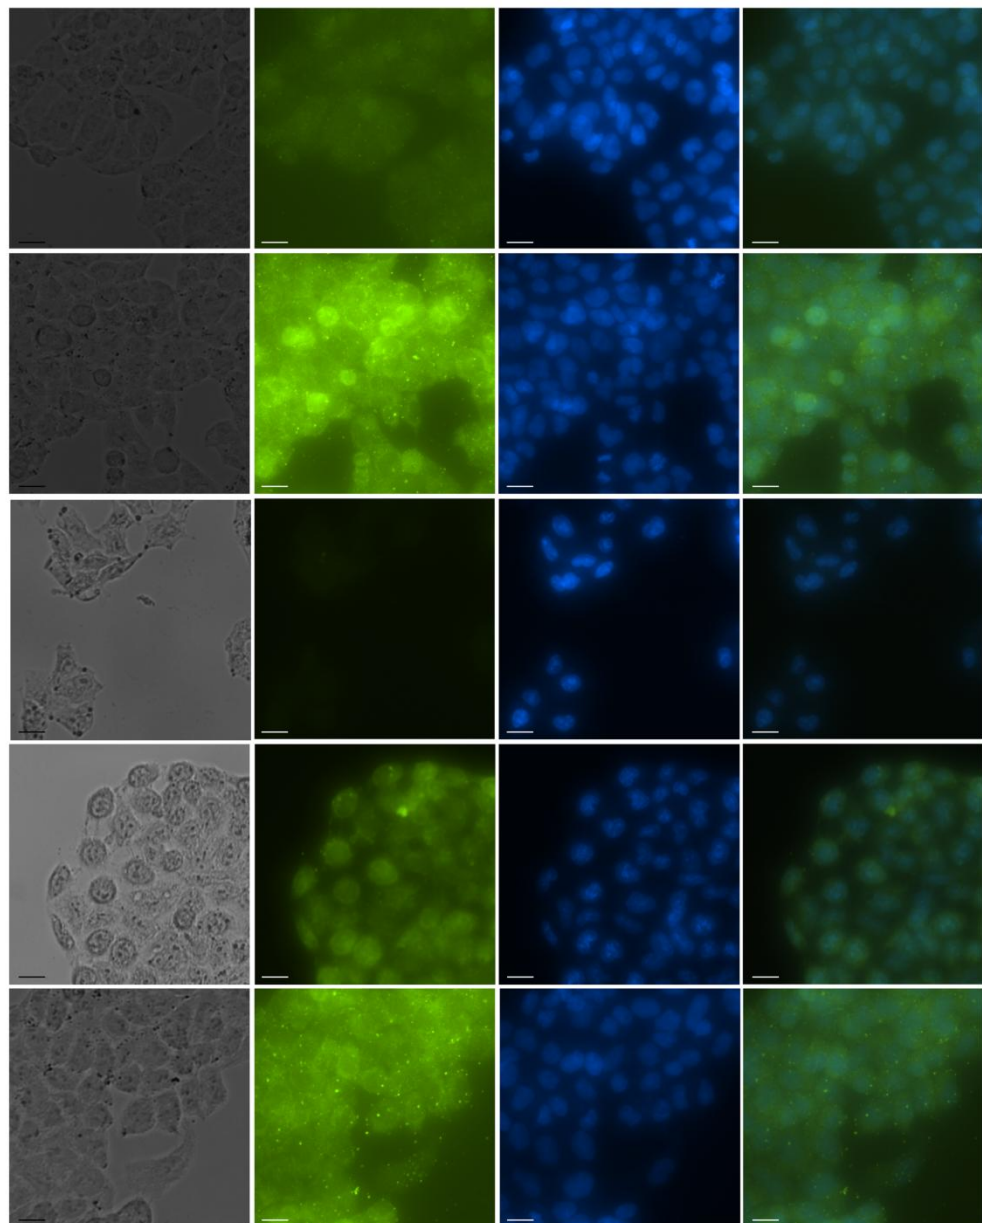

Figure S2C

CT26

N

R

P

PR

C

white

FITC

DAPI

merge

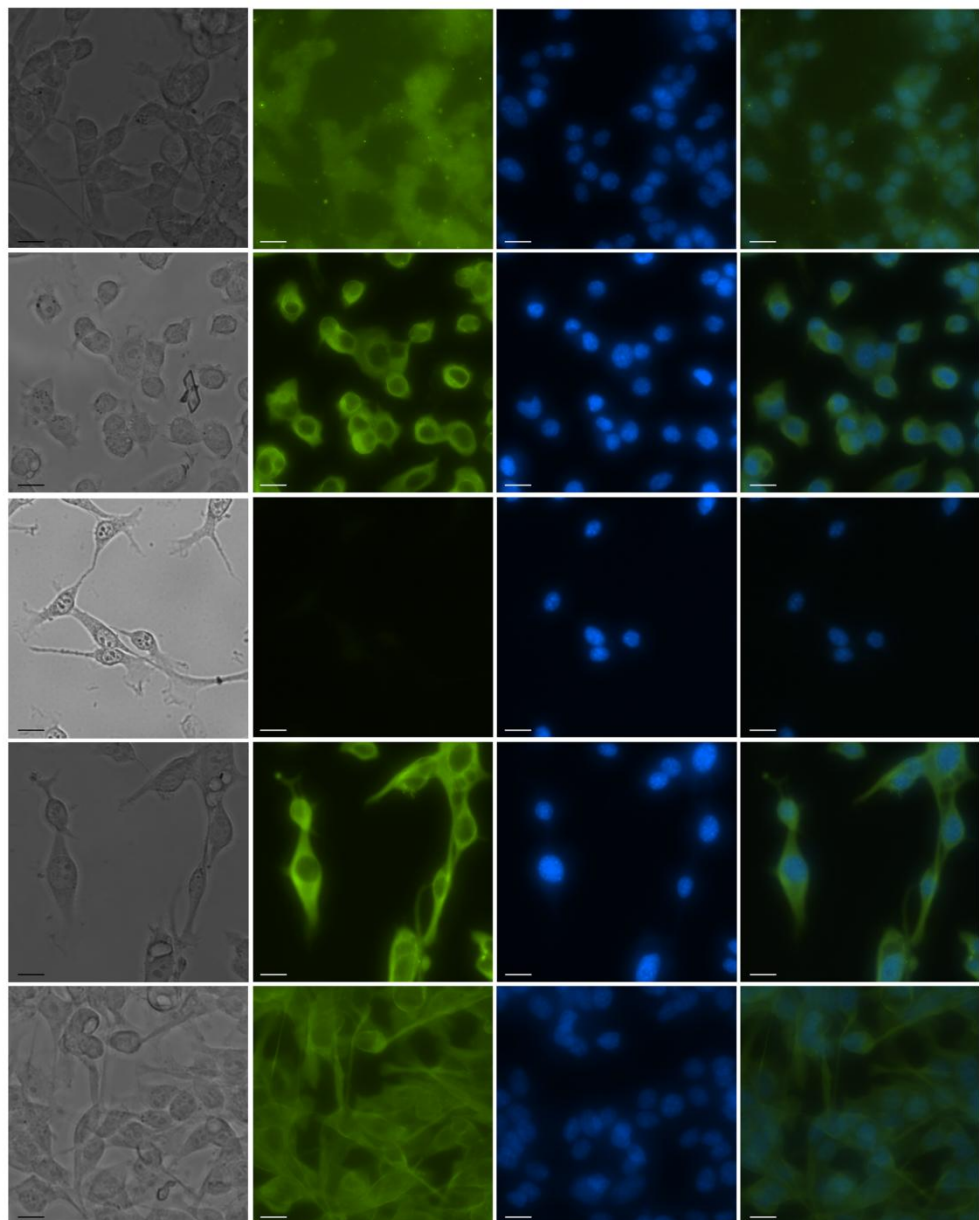

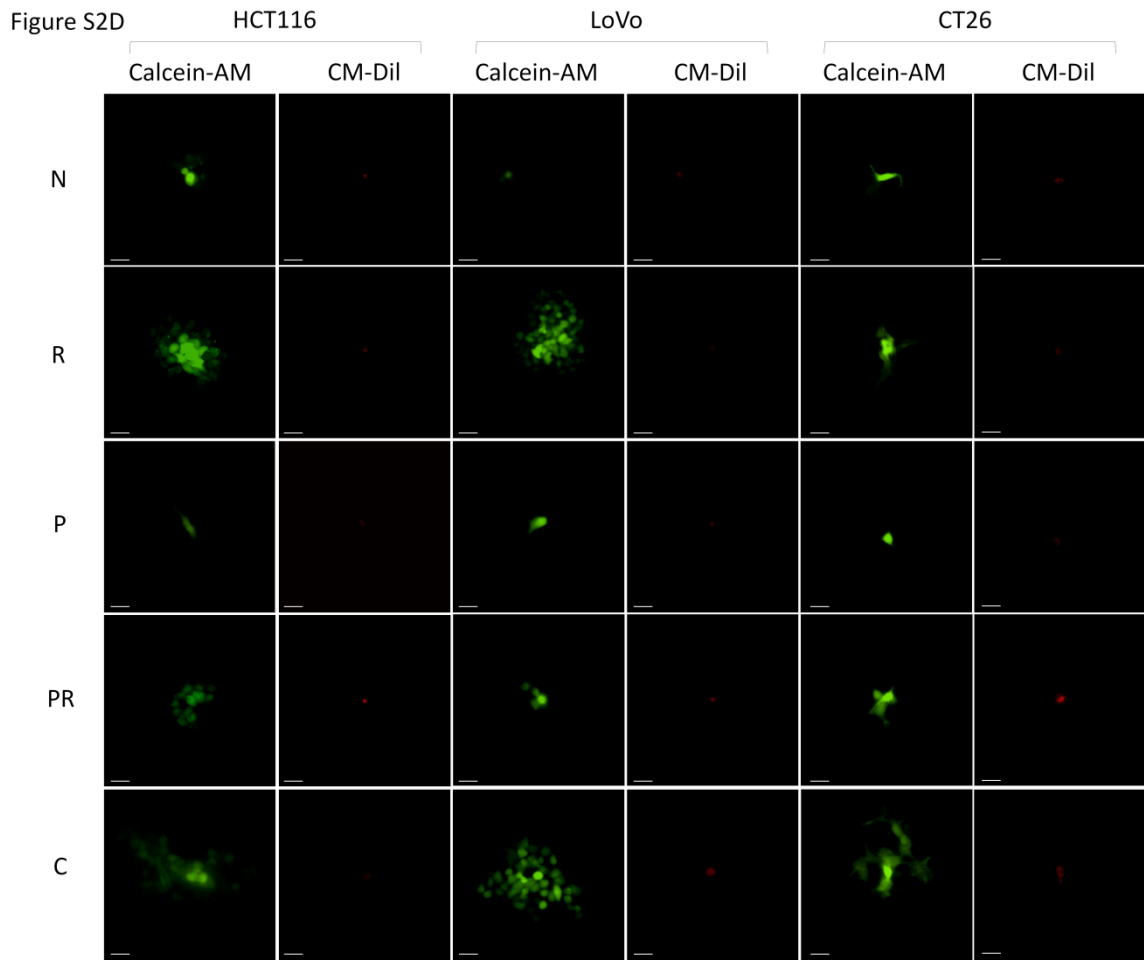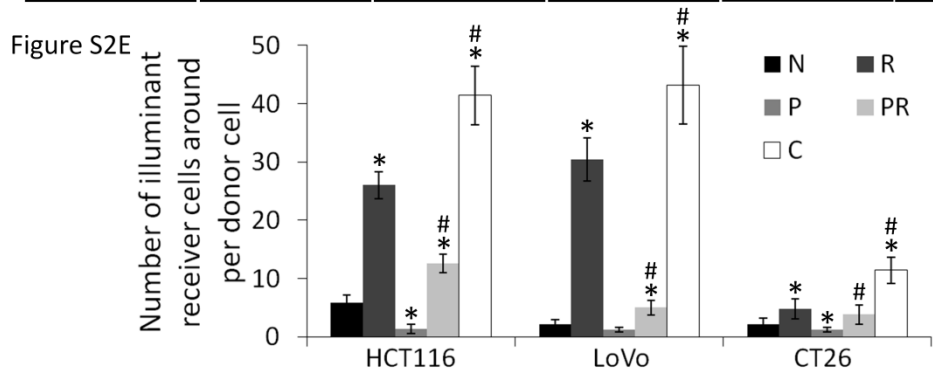

**Figure S2: The location of Cx43 expression in cells and GJ function analysis.** “N”, “R”, “P”, “PR” and “C” were defined in caption of Fig.1. The scale bars represent 20  $\mu\text{m}$ . (A-C) **Immunocytochemistry analysis of Cx43.** Cells were immunostained with Cx43 antibody followed by FITC-conjugated antibody. (D) “Parachute” dye-coupling assay of GJ function. (E) Columns show the mean from five independent experiments and standard deviations are shown as error bars. \* $P < 0.05$  represents a significant difference to “N”, and # $P < 0.05$  represents “PR” and “P” has a significant difference.
