# Supplementary material for: All‐trans retinoic acid reverses epithelial‐mesenchymal transition in paclitaxel‐resistant cells by inhibiting nuclear factor kappa B and upregulating gap junctions
Source: PubMed Central journal article supplement — Cancer Sci. 2018 Nov 27;110(1):379–88. doi: 10.1111/cas.13855 (PMC6317959; doi:10.1111/cas.13855), 2018-11-27
Supplement: CAS-110-379-s004.pdf [file CAS-110-379-s004.pdf]

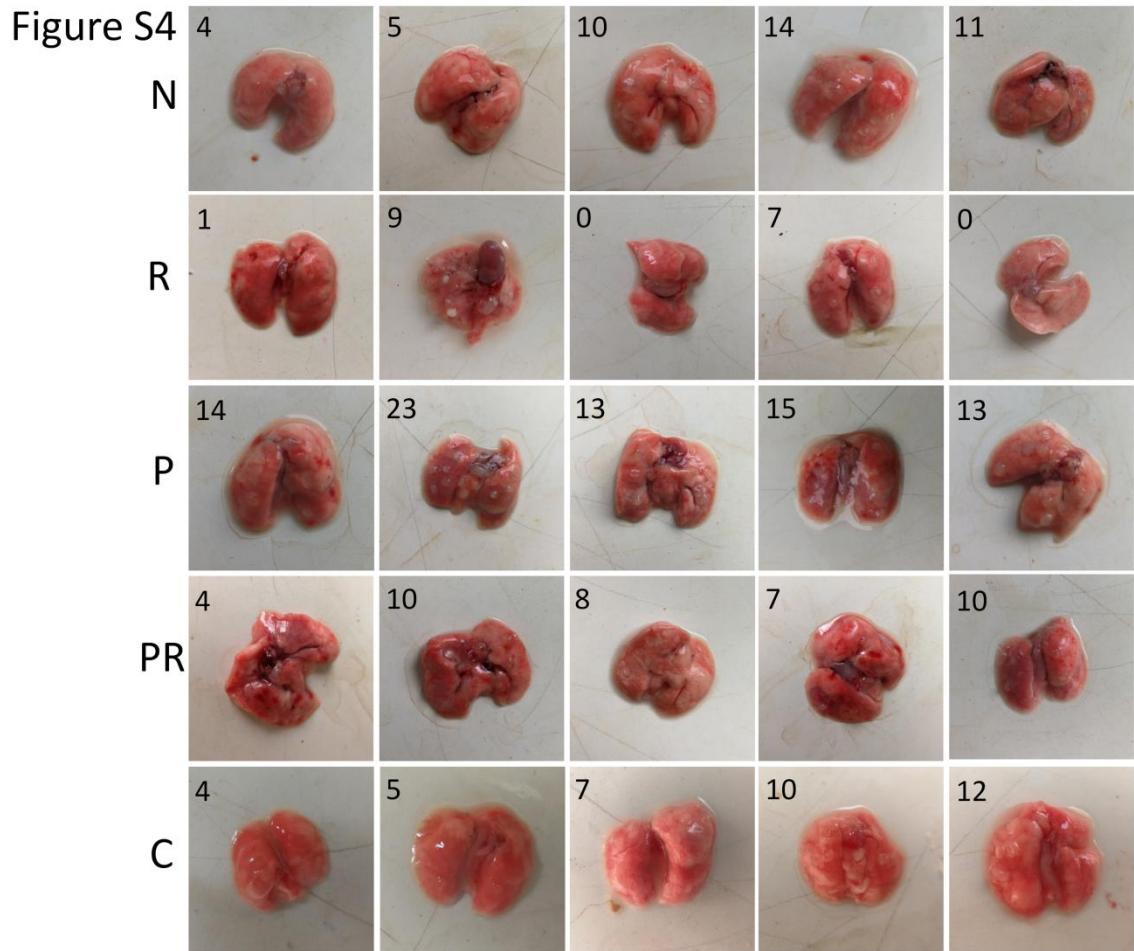

**Figure S4:** The pulmonary metastasis of mice. Where “N” presents mice were injected with CT26 cells, “R” presents mice of group “N” were treated with ATRA, “P” presents mice were injected with CT26-P cells, “PR” presents mice of group “P” were treated with ATRA, and “C” are mice injected with CT26-C cells.. The number indicates tumor nodules on the surface of the lung.
