# Supplementary figures and images for: All‐trans retinoic acid reverses epithelial‐mesenchymal transition in paclitaxel‐resistant cells by inhibiting nuclear factor kappa B and upregulating gap junctions
Source: PubMed Central journal article supplement — Cancer Sci. 2018 Nov 27;110(1):379–88. doi: 10.1111/cas.13855 (PMC6317959; doi:10.1111/cas.13855), 2018-11-27

Figure S5

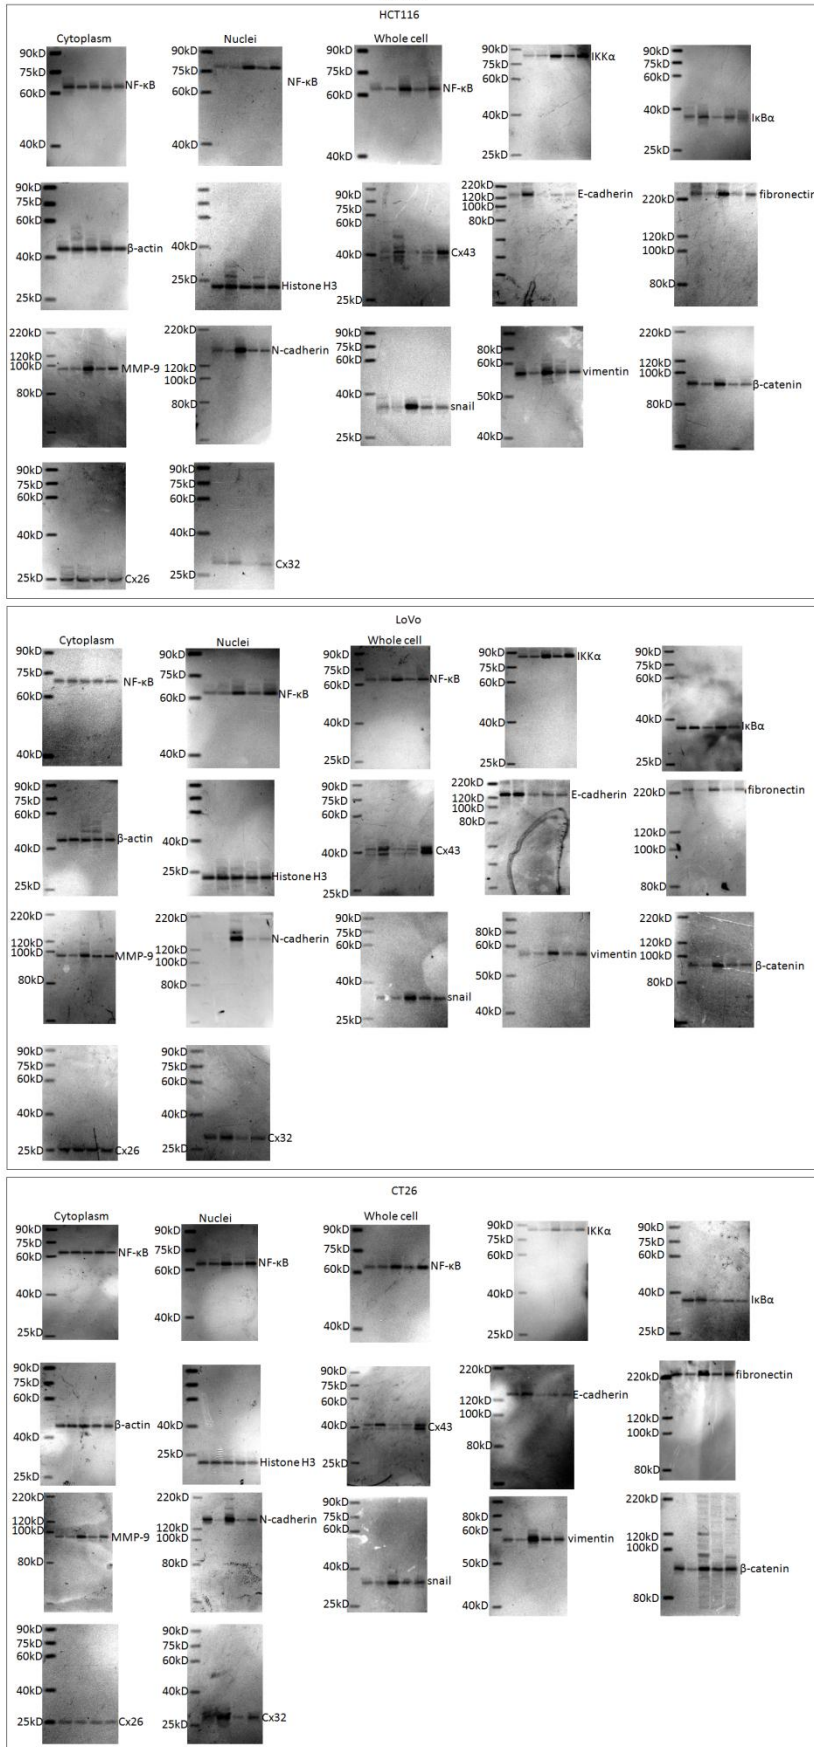

Figure S5: full length blots of western blot results.

Supplement: CAS-110-379-s005.pdf [file CAS-110-379-s005.pdf]
